# Supplementary material for: High-throughput computation and machine learning screening of van der Waals heterostructures for Z-scheme photocatalysis
Source: Royal Society of Chemistry journal article supplement (doi:10.1039/d4ta07683d), 2025-01-01
Supplement: d4ta07683d1.xlsx [file d4ta07683d1.xlsx]

## Sheet: 1-materials property
number	species	lattice_a (Å)	lattice_b (Å)	lattice_c (Å)	lattice_alpha (°)	lattice_beta (°)	lattice_gamma (°)	Band gap (eV)	Gap type	CBM_Vac (eV)	VBM_Vac (eV)
102	Ba2TiO4-2dm-3897	3.97452	3.97472	23.9482	90	90	90	3.2708	Indirect	-0.6905	-3.9613
146	CaO-2dm-3363	3.32001	3.32001	22.3955	90	90	89.9967	3.5428	Direct	-0.9759	-4.5187
150	LiCuO-2dm-4132	3.51179	5.08079	21.8966	90	90	90	2.5136	Indirect	-1.1053	-3.6189
98	Sr2CoO3-2dm-4427	3.51304	3.51304	24.5211	90	90	90.5861	1.4245	Direct	-1.2089	-2.6334
126	KH2N-2dm-3412	3.72549	4.60174	24.6113	90	90	90	3.4949	Direct	-1.2443	-4.7392
151	Ca2CoO3-2dm-3010	3.94333	3.94333	24.2351	90	90	57.1554	2.411	Indirect	-1.2965	-3.7075
143	CaO2-2dm-4188	3.23213	3.23213	21.5194	90	90	90	4.8032	Indirect	-1.5211	-6.3243
65	Ca3SiBr2-2dm-4523	4.53103	5.82853	24.8564	90	90	90	1.3211	Indirect	-1.5932	-2.9143
7	LiSbO2-2dm-5711	5.28575	5.37607	21.8544	90	90	98.8896	3.644	Indirect	-2.0706	-5.7146
129	CuI-2dm-3638	3.99273	3.99273	23.3968	90	90	90	3.3754	Direct	-2.1967	-5.5721
90	CuI-2dm-4972	4.10572	4.10572	23.8053	90	90	120	3.3177	Direct	-2.2347	-5.5524
104	VCl2-2dm-3622	3.62801	3.62801	22.6655	90	90	120	4.0714	Indirect	-2.3479	-6.4193
124	CuBiO2-2dm-4048	3.52711	6.1511	23.4941	89.3146	90	90	2.5185	Indirect	-2.3678	-4.8863
153	Cu2SO4-2dm-3586	4.45638	5.78898	21.7745	90	90	112.638	3.7665	Indirect	-2.5408	-6.3073
32	AgBiO2-2dm-5528	3.5182	6.68813	23.757	89.7858	90	90	3.0941	Indirect	-2.5429	-5.637
138	VI2-2dm-3251	4.08909	4.08903	23.1445	90	90	60.0005	3.5823	Indirect	-2.551	-6.1333
147	GaN-2dm-2992	3.20498	3.20518	20.0053	90	90	119.998	3.4614	Indirect	-2.5558	-6.0172
42	AgN3-2dm-3449	5.40958	6.34851	21.2488	90	90	90	3.0834	Indirect	-2.6282	-5.7116
88	Ba(BSe3)2-2dm-4261	6.86842	6.86842	22.8792	90	90	112.157	3.2051	Indirect	-2.6934	-5.8985
56	AgNO3-2dm-4750	5.25239	5.25239	20.9733	90	90	60	4.1205	Indirect	-2.7082	-6.8287
131	SnO-2dm-3088	3.50903	3.50903	22.7891	90	90	98.5679	2.9558	Indirect	-2.7807	-5.7365
70	CuBr-2dm-3405	4.07136	4.07136	20	90	90	120	2.7418	Direct	-2.796	-5.5378
96	AuI-2dm-3495	4.23104	4.23104	24.1225	90	90	92.7938	2.6353	Indirect	-2.799	-5.4343
36	Al2Zn2S5-2dm-3288	3.64664	3.64664	31.8875	90	90	120	2.5112	Indirect	-2.8349	-5.3461
43	Mg(AlS2)2-2dm-3543	3.6862	3.6862	29.0384	90	90	60	3.1164	Indirect	-2.8871	-6.0035
3	ZnO-2dm-3277	3.2891	3.2891	20.6349	90	90	120	3.2849	Direct	-2.8991	-6.184
10	SnS-2dm-3338	3.75683	5.78079	22.225	90	90	90	2.589	Indirect	-2.9152	-5.5042
60	AgClO4-2dm-3393	4.8043	4.8043	21.726	90	90	90	4.7861	Indirect	-3.0838	-7.8699
103	AuBr-2dm-4576	4.13551	4.13551	23.9042	90	90	91.0748	2.9611	Indirect	-3.0867	-6.0478
46	Al2ZnS4-2dm-3208	3.65711	3.65711	28.9622	90	90	60	2.5394	Indirect	-3.1115	-5.6509
73	MnBr2-2dm-3606	3.85183	3.85184	23.1073	90	90	120	4.1332	Indirect	-3.1609	-7.2941
127	MnCl2-2dm-3745	3.68684	3.68684	22.7661	90	90	60	4.6883	Indirect	-3.165	-7.8533
30	ZnSe-2dm-4928	4.05133	4.05133	23.0245	90	90	90	3.4399	Direct	-3.1859	-6.6258
45	Al2Zn2S5-2dm-3191	3.64207	3.64207	31.8944	90	90	60	2.1766	Indirect	-3.203	-5.3796
113	MnI2-2dm-3728	4.1262	4.1262	23.3203	90	90	120	3.2666	Indirect	-3.2073	-6.4739
97	CuBr-2dm-3517	3.7765	3.7765	23.1726	90	90	90	3.171	Direct	-3.2117	-6.3827
41	Mg2Al2Se5-2dm-4027	3.87877	3.87877	32.8007	90	90	120	2.2594	Direct	-3.2131	-5.4725
62	Sr(SnAs)2-2dm-4761	4.15928	4.15928	27.2376	90	90	60	1.4213	Indirect	-3.2348	-4.6561
23	SnSe-2dm-4801	3.89505	6.16619	21.9931	90	90	90	2.292	Indirect	-3.2352	-5.5272
51	Ag2SO4-2dm-4885	4.95241	6.28601	21.7623	90	90	113.199	3.6744	Indirect	-3.2547	-6.9291
40	AgI-2dm-4861	4.35037	4.35037	23.6241	90	90	90	3.1263	Direct	-3.2846	-6.4109
47	Mg(AlSe2)2-2dm-4113	3.88553	3.88553	29.6273	90	90	60	2.2421	Direct	-3.296	-5.5381
22	Te2W-2dm-3050	3.52474	3.52474	23.6461	90	90	120	1.6486	Direct	-3.3091	-4.9577
33	AgI-2dm-3794	4.45108	4.45107	23.6406	90	90	120	3.0515	Direct	-3.3361	-6.3876
12	WSe2-2dm-3594	3.29497	3.29497	23.3625	90	90	120	2.1139	Direct	-3.3544	-5.4683
15	Mn(SbS2)2-2dm-3170	3.79772	6.50118	24.7323	90	90	106.982	2.0793	Indirect	-3.3932	-5.4725
38	Al2Zn2S5-2dm-2999	3.64127	3.64127	31.891	90	90	120	1.9652	Indirect	-3.4313	-5.3965
0	Sb-2dm-3356	4.12306	4.12306	21.5227	90	90	60	1.834	Indirect	-3.4443	-5.2783
140	GaS-2dm-4063	3.62044	3.62044	24.6231	90	90	60	3.354	Indirect	-3.4471	-6.8011
117	InSe-2dm-3756	4.08088	5.94844	23.2414	90	90	69.939	2.6018	Indirect	-3.459	-6.0608
57	Al2Te5-2dm-4985	4.18065	8.30639	24.0781	90	90	104.575	1.954	Indirect	-3.4877	-5.4417
128	GaS-2dm-3608	3.60874	3.60874	24.6404	90	90	120	3.2877	Indirect	-3.5549	-6.8426
111	GeI2-2dm-3455	4.25402	4.25402	23.5159	90	90	120	2.8321	Indirect	-3.5736	-6.4057
25	Te2Mo-2dm-5370	3.52039	3.52039	23.6194	90	90	120	1.5993	Direct	-3.574	-5.1733
54	As-2dm-3312	3.60329	3.60329	21.2879	90	90	60	2.231	Indirect	-3.5758	-5.8068
116	CdI2-2dm-4402	4.2732	4.2732	23.4358	90	90	120	3.4297	Indirect	-3.59	-7.0197
115	GaSe-2dm-3530	3.79643	3.79643	24.8175	90	90	120	2.8027	Indirect	-3.5923	-6.395
119	GaTe-2dm-3099	4.11517	4.11517	25.0193	90	90	120	2.1595	Indirect	-3.6164	-5.7759
39	As-2dm-3447	3.70482	4.68041	22.4239	90	90	90	1.248	Indirect	-3.6278	-4.8758
77	HfBrN-2dm-4609	3.55954	4.09947	25.9128	90	90	90	3.2457	Direct	-3.6349	-6.8806
78	IrBr3-2dm-3663	6.41274	6.41274	22.7826	90	90	119.997	3.0928	Indirect	-3.6744	-6.7672
94	IrCl3-2dm-3776	6.09267	6.09267	22.5323	89.9774	89.9774	119.98	3.5697	Indirect	-3.7088	-7.2785
8	WS2-2dm-3749	3.17375	3.17375	23.131	90	90	120	2.3606	Direct	-3.7228	-6.0834
1	MoSe2-2dm-3409	3.29515	3.29515	23.3452	90	90	120	1.9841	Direct	-3.734	-5.7181
17	PdSe2-2dm-3426	5.68448	5.86862	21.4748	90	90	90	2.3312	Indirect	-3.7477	-6.0789
86	SnClF-2dm-5132	3.95491	3.95491	25.1454	90	90	90	3.5151	Indirect	-3.7608	-7.2759
112	ZnI2-2dm-4716	4.06823	4.06823	23.26	90	90	60	2.9924	Indirect	-3.7767	-6.7691
133	Cu2WSe4-2dm-3107	5.53356	5.53356	22.8379	90	90	90	2.0263	Indirect	-3.7767	-5.803
11	NiS2-2dm-5050	5.19231	5.31466	21.1022	90	90	89.9965	2.5317	Indirect	-3.802	-6.3337
68	BiI3-2dm-3628	7.59641	7.59641	23.7042	90	90	60	3.2425	Indirect	-3.8473	-7.0898
142	GeS2-2dm-3352	3.48765	3.48765	22.8555	90	90	90	2.4395	Indirect	-3.8523	-6.2918
141	Mn(BiTe2)2-2dm-3199	4.30213	4.30213	30.8817	90	90	60	1.4231	Indirect	-3.8664	-5.2895
122	Cu2WS4-2dm-4517	5.40643	5.40643	22.6092	90	90	90	2.5098	Indirect	-3.8723	-6.3821
149	TaI2O-2dm-3609	3.89186	7.47016	24.7223	90.0053	90	90	1.8198	Indirect	-3.873	-5.6928
145	GaGeTe-2dm-4155	4.0983	4.0983	28.2891	90	90	60	1.4736	Direct	-3.881	-5.3546
55	AsI3-2dm-5507	7.18705	7.18705	23.3631	90	90	60	2.8798	Indirect	-3.9025	-6.7823
132	P-2dm-3043	3.27309	3.27309	21.138	90	90	60	2.7918	Indirect	-3.9656	-6.7574
16	Te2Pt-2dm-4255	3.97371	3.97371	22.7253	90	90	120	1.027	Indirect	-3.9731	-5.0001
26	PdS2-2dm-3017	5.43846	5.54541	21.2585	90	90	90	2.2677	Indirect	-4.0184	-6.2861
121	SnBrF-2dm-3978	4.02406	4.02406	25.9446	90	90	90	3.1944	Indirect	-4.0594	-7.2538
61	NiBr2-2dm-3741	3.64605	3.64605	22.803	90	90	60	3.2808	Indirect	-4.074	-7.3548
105	CuTe2Cl-2dm-4859	5.063	8.04655	22.7182	90	90	90	1.7337	Indirect	-4.0744	-5.8081
100	CuTe2I-2dm-5239	5.16779	8.43491	23.2724	90	90	90	1.7214	Indirect	-4.0904	-5.8118
79	InBr3-2dm-4040	6.80109	6.80058	23.1726	90	90	59.9974	4.0525	Indirect	-4.0907	-8.1432
44	Ag2SeO4-2dm-3267	4.77156	6.48562	22.0266	90	90	111.584	3.0392	Indirect	-4.093	-7.1322
67	CuTe2Br-2dm-5156	5.12802	8.22824	22.975	90	90	90	1.7551	Indirect	-4.0989	-5.854
95	BiBr3-2dm-3868	7.18732	7.18732	23.4761	90	90	120.024	3.7655	Indirect	-4.1076	-7.8731
99	NiCl2-2dm-3432	3.45607	3.45607	22.6136	90	90	60	4.0756	Indirect	-4.1104	-8.186
21	Li2WS4-2dm-5501	5.98397	5.98397	22.4811	90	90	90	3.1847	Indirect	-4.1116	-7.2963
2	MoS2-2dm-3150	3.16209	3.16209	23.1298	90	90	120	2.2311	Direct	-4.1206	-6.3517
137	TeRhCl-2dm-3467	3.67327	6.64451	22.711	90	90	90	2.2961	Direct	-4.1485	-6.4446
139	Ge(Te2As)2-2dm-3605	4.08953	4.08953	30.3981	90	90	60	0.8537	Direct	-4.1548	-5.0085
52	Ge2Te5As2-2dm-3653	4.11792	4.11792	33.8724	90	90	120	0.6569	Indirect	-4.1603	-4.8172
120	GeClF-2dm-4252	3.72531	3.72531	25.0638	90	90	90	3.9466	Indirect	-4.1617	-8.1083
37	Te3As2-2dm-5359	4.03662	4.03662	27.3032	90	90	60	1.0034	Direct	-4.1632	-5.1666
106	Ge(BiTe2)2-2dm-3740	4.3501	4.3501	31.0594	90	90	60	1.4113	Indirect	-4.198	-5.6093
114	InSe-2dm-3459	4.05094	4.05094	25.367	90	90	60	2.3093	Indirect	-4.2254	-6.5347
20	PtSe2-2dm-3287	3.72133	3.72133	22.6134	90	90	120	1.9272	Indirect	-4.2329	-6.1601
4	TeO2-2dm-3164	3.34394	3.3443	24.1612	90	90	90	2.21	Direct	-4.2541	-6.4641
81	B2S3-2dm-3796	5.45637	5.45637	20.0118	90	90	60	2.8901	Direct	-4.2545	-7.1446
136	Sn(BiTe2)2-2dm-5176	4.40978	4.40978	31.3079	90	90	60	1.1099	Indirect	-4.3018	-5.4117
76	RhBr3-2dm-3618	6.35316	6.35316	22.8194	90	90	120	2.8893	Indirect	-4.3552	-7.2445
75	Bi2Te3-2dm-4406	4.39041	4.39041	27.569	90	90	60	1.4451	Indirect	-4.3906	-5.8357
13	SiS-2dm-3240	3.95275	6.63035	24.0717	90	90	90	1.2498	Direct	-4.3973	-5.6471
18	PtS2-2dm-4136	3.55773	3.55773	22.6625	90	90	120	2.6261	Indirect	-4.4168	-7.0429
110	HfTeSe4-2dm-4723	3.85229	6.82124	23.2127	90	90	90	1.5731	Indirect	-4.4662	-6.0393
123	GaSe-2dm-3781	3.92334	3.92334	25.2825	90	90	120	0.9125	Direct	-4.468	-5.3805
82	Bi2Te2S-2dm-3473	4.26542	4.26542	27.0695	90	90	60	1.4428	Indirect	-4.4736	-5.9164
49	AgCl-2dm-5106	3.69073	3.76457	23.1333	90	90	90	2.2951	Indirect	-4.4787	-6.7738
101	LiCuO2-2dm-4683	2.67287	5.3526	17.2911	83.9713	90	90	2.6703	Indirect	-4.4811	-7.1514
74	Bi2Te2Se-2dm-4819	4.30415	4.30416	27.3876	90	90	60	1.3721	Indirect	-4.4877	-5.8598
91	InBrO-2dm-3667	3.66368	4.09955	25.9787	90	90	90	3.5659	Indirect	-4.4898	-8.0557
107	RhCl3-2dm-3458	6.01573	6.01573	22.6312	90	90	119.997	3.3596	Indirect	-4.4997	-7.8593
135	BiClO-2dm-3678	3.88172	3.88172	25.2998	90	90	90	3.7296	Indirect	-4.5282	-8.2578
87	CrBr3-2dm-3768	6.35973	6.35971	22.8716	90	90	120	3.0206	Indirect	-4.5442	-7.5648
84	CrCl3-2dm-3836	5.99089	5.99135	22.677	90	90	119.997	3.9665	Indirect	-4.5455	-8.512
118	HfS3-2dm-3809	3.58914	5.10448	25.8916	90	90	90	1.9862	Indirect	-4.5957	-6.5819
85	InClO-2dm-3585	3.56034	4.12578	25.6635	90	90	90	4.055	Indirect	-4.6574	-8.7124
64	BiIO-2dm-3710	4.01201	4.01201	26.222	90	90	90	2.2901	Indirect	-4.6628	-6.9529
27	Sb2TeSe2-2dm-3937	4.11799	4.11799	27.1644	90	90	60	1.2052	Indirect	-4.6657	-5.8709
66	CuSe2Br-2dm-4942	4.90869	7.75492	23.0886	90	90	90	1.6852	Indirect	-4.6723	-6.3575
59	Bi2Te2S-2dm-4461	4.25157	4.25174	26.4872	90	90	90	0.7716	Indirect	-4.6796	-5.4512
92	CuSe2Cl-2dm-4225	4.91146	7.66695	22.7799	90	90	90	1.7087	Indirect	-4.6957	-6.4044
83	BiBrO-2dm-3406	3.92919	3.92919	25.7315	90	90	90	3.3404	Indirect	-4.7152	-8.0556
31	Sn(PS3)2-2dm-5267	6.0608	6.0608	23.3736	90	90	60	2.4161	Indirect	-4.7198	-7.1359
72	Bi2TeSe2-2dm-4503	4.23207	4.23207	27.476	90	90	60	1.6648	Indirect	-4.7558	-6.4206
48	AgBrO4-2dm-4961	4.92489	4.92489	21.8519	90	90	90	3.3134	Indirect	-4.7591	-8.0725
130	SbClO-2dm-4179	3.76533	3.76533	25.2419	90	90	90	2.913	Indirect	-4.7814	-7.6944
109	HfSe2-2dm-4424	3.76173	3.76173	23.1503	90	90	120	1.3097	Indirect	-4.8264	-6.1361
71	SbBrO-2dm-4701	3.81725	3.81725	25.5969	90	90	90	2.5549	Indirect	-4.9306	-7.4855
108	HfS2-2dm-3834	3.63302	3.63302	22.877	90	90	120	2.0934	Indirect	-4.9353	-7.0287
6	SnS2-2dm-3203	3.6798	3.6798	22.9557	90	90	120	2.3995	Indirect	-5.0142	-7.4137
80	Bi2Se3-2dm-4453	4.15102	4.15102	27.0403	90	90	60	1.4564	Indirect	-5.0144	-6.4708
69	Br-2dm-5522	4.18103	8.69979	19.8616	90	90	90	2.436	Indirect	-5.0471	-7.4831
89	PdCl2-2dm-3243	3.89003	6.44304	22.6053	90	90	90	2.5354	Indirect	-5.0744	-7.6098
5	NiS2-2dm-5509	3.32265	3.32265	22.3743	90	90	60	1.0955	Indirect	-5.1097	-6.2052
29	PtO2-2dm-4178	3.14553	3.14553	21.8959	90	90	120	3.2788	Indirect	-5.1279	-8.4067
58	SnSe2-2dm-4715	3.85182	3.85182	23.1929	90	90	120	1.4393	Indirect	-5.1507	-6.59
9	TiO2-2dm-3816	2.98866	2.98866	21.9353	90	90	60	4.2053	Indirect	-5.3055	-9.5108
144	TiBrN-2dm-3460	3.35868	3.93823	25.497	90	90	90	1.5353	Direct	-5.4289	-6.9642
19	SnO2-2dm-5126	3.2246	3.2246	22.0307	90	90	60	4.1815	Indirect	-5.4522	-9.6337
125	AuBrO2-2dm-4476	3.85628	7.47706	23.0349	90	90	90	1.7754	Indirect	-5.4666	-7.242
14	TiNF-2dm-3400	3.0513	3.95274	24.3349	90	90	90	1.6907	Direct	-5.5224	-7.2131
35	AuClO2-2dm-3945	3.88409	7.28027	22.8039	90	90	90	1.9695	Indirect	-5.5614	-7.5309
148	TiNCl-2dm-3655	3.25611	3.94564	25.2247	90	90	90	1.5458	Direct	-5.5874	-7.1332
50	WF5-2dm-4702	3.67082	4.41289	23.822	90	90	90	1.7945	Indirect	-5.6745	-7.469
63	AuO2F-2dm-4797	3.83102	6.94788	22.0822	90	90	90	2.2818	Indirect	-5.7171	-7.9989
154	V2CoO6-2dm-3124	3.63341	7.60538	24.9474	90	90	76.1801	2.5739	Indirect	-6.1067	-8.6806
53	TiMn2O6-2dm-4397	2.91733	7.69231	21.9262	90	90	100.931	3.3404	Indirect	-6.2463	-9.5867
152	CuClO2-2dm-5076	3.58964	6.90412	22.7211	90	90	90	1.7225	Direct	-6.271	-7.9935
28	MoN2-2dm-4068	3.60428	5.5253	22.4965	90	90	70.9641	0.6514	Direct	-6.8279	-7.4793
93	CrO2-2dm-5091	2.88505	2.88691	21.9119	90	90	60.042	1.7272	Indirect	-7.1761	-8.9033
134	Mn2CrO6-2dm-4419	2.84858	7.68206	21.9278	90	90	100.685	1.9628	Indirect	-7.475	-9.4378
24	SbF5-2dm-4722	3.71663	4.54516	23.5333	90	90	90	2.4723	Indirect	-7.79	-10.2623
34	MoF5-2dm-4729	3.64395	4.47828	23.7863	90	90	90	0.4384	Indirect	-8.3142	-8.7526
