# Supplementary material for: High-throughput computation and machine learning screening of van der Waals heterostructures for Z-scheme photocatalysis
Source: Royal Society of Chemistry journal article supplement (doi:10.1039/d4ta07683d), 2025-01-01
Supplement: d4ta07683d2.xlsx [file d4ta07683d2.xlsx]

## Sheet: Allen materials electronegativi
number	species	element-1	total electrons of (element-1)	s electrons of (element-1)	p electrons of (element-1)	d electrons of (element-1)	element-2	total electrons of (element-2)	s electrons of (element-2)	p electrons of (element-2)	d electrons of (element-2)	element-3	total electrons of (element-3)	s electrons of (element-3)	p electrons of (element-3)	d electrons of (element-3)	Allen material electronegativity
0	Sb-2dm-3356	Sb	5	2	3	0	0	0	0	0	0	0	0	0	0	0	1.98493
1	MoSe2-2dm-3409	Mo	11.1187	1	0	4.11874	Se	6.44063	2	4.44063	0	0	0	0	0	0	2.12679
2	MoS2-2dm-3150	Mo	10.8951	1	0	3.89505	S	6.55247	2	4.55247	0	0	0	0	0	0	2.24906
3	ZnO-2dm-3277	Zn	10.7844	2	0	8.78437	O	7.21564	2	5.21564	0	0	0	0	0	0	2.98814
4	TeO2-2dm-3164	Te	3.88376	2	1.88376	0	O	7.05812	2	5.05812	0	0	0	0	0	0	3.24684
5	NiS2-2dm-5509	Ni	15.3806	2	0	7.38056	S	6.30972	2	4.30972	0	0	0	0	0	0	2.32721
6	SnS2-2dm-3203	Sn	12.488	2	0.488034	0	S	6.75598	2	4.75598	0	0	0	0	0	0	2.47134
7	LiSbO2-2dm-5711	Li	2.10756	0.107564	0	0	Sb	3.32244	2	1.32244	0	O	7.285	2	5.285	0	3.21408
8	WS2-2dm-3749	W	10.7426	2	0	2.74256	S	6.62872	2	4.62872	0	0	0	0	0	0	2.24902
9	TiO2-2dm-3816	Ti	7.83283	1	0	0.832832	O	7.08358	2	5.08358	0	0	0	0	0	0	3.22738
10	SnS-2dm-3338	Sn	13.0676	2	1.06765	0	S	6.93236	2	4.93236	0	0	0	0	0	0	2.35545
11	NiS2-2dm-5050	Ni	15.5171	2	0	7.51715	S	6.24142	2	4.24142	0	0	0	0	0	0	2.32858
12	WSe2-2dm-3594	W	10.9936	2	0	2.99364	Se	6.50318	2	4.50318	0	0	0	0	0	0	2.12427
13	SiS-2dm-3240	Si	2.82662	2	0.826621	0	S	7.17338	2	5.17338	0	0	0	0	0	0	2.39615
14	TiNF-2dm-3400	Ti	7.97813	1	0	0.97813	N	6.33958	2	4.33958	0	F	7.68229	2	5.68229	0	3.28338
15	Mn(SbS2)2-2dm-3170	Mn	11.8381	1	0	4.83811	Sb	3.85146	2	1.85146	0	S	6.86474	2	4.86474	0	2.34038
16	Te2Pt-2dm-4255	Te	5.76583	2	3.76583	0	Pt	10.4683	1	0	9.46835	0	0	0	0	0	1.96332
17	PdSe2-2dm-3426	Pd	9.91671	0	0	9.91671	Se	6.04165	2	4.04165	0	0	0	0	0	0	2.05885
18	PtS2-2dm-4136	Pt	9.59873	1	0	8.59873	S	6.20064	2	4.20064	0	0	0	0	0	0	2.20052
19	SnO2-2dm-5126	Sn	11.6897	1.6897	0	0	O	7.15515	2	5.15515	0	0	0	0	0	0	3.35492
20	PtSe2-2dm-3287	Pt	9.94346	1	0	8.94346	Se	6.02827	2	4.02827	0	0	0	0	0	0	2.1065
21	Li2WS4-2dm-5501	Li	2.13078	0.130783	0	0	W	10.3779	2	0	2.37785	S	6.84015	2	4.84015	0	2.3557
22	Te2W-2dm-3050	Te	6.30269	2	4.30269	0	W	11.3946	2	0	3.39461	0	0	0	0	0	1.93335
23	SnSe-2dm-4801	Sn	13.2201	2	1.22013	0	Se	6.77987	2	4.77987	0	0	0	0	0	0	2.23362
24	SbF5-2dm-4722	Sb	2.07455	2	0.074553	0	F	7.58509	2	5.58509	0	0	0	0	0	0	4.04279
25	Te2Mo-2dm-5370	Te	6.25196	2	4.25196	0	Mo	11.4961	1	0	4.49609	0	0	0	0	0	1.93865
26	PdS2-2dm-3017	Pd	9.70543	1	0	9.70543	S	6.14728	2	4.14728	0	0	0	0	0	0	2.11411
27	Sb2TeSe2-2dm-3937	Sb	4.19431	2	2.19431	0	Te	6.51859	2	4.51859	0	Se	6.5464	2	4.5464	0	2.23013
28	MoN2-2dm-4068	Mo	9.89561	1	0	2.89561	N	6.05219	2	4.05219	0	0	0	0	0	0	2.56486
29	PtO2-2dm-4178	Pt	8.61242	1	0	7.61242	O	6.69379	2	4.69379	0	0	0	0	0	0	2.81233
30	ZnSe-2dm-4928	Zn	11.3163	2	0	9.31634	Se	6.68366	2	4.68366	0	0	0	0	0	0	2.56733
31	Sn(PS3)2-2dm-5267	Sn	12.5149	2	0.51494	0	P	4.02198	2	2.02198	0	S	6.57352	2	4.57352	0	2.4968
32	AgBiO2-2dm-5528	Ag	10.5381	1	0	9.53808	Bi	3.34553	2	1.34553	0	O	7.05819	2	5.05819	0	2.80946
33	AgI-2dm-3794	Ag	10.7558	1	0	9.7558	I	7.2442	2	5.2442	0	0	0	0	0	0	2.18509
34	MoF5-2dm-4729	Mo	9.26945	1	0	2.26945	F	7.54611	2	5.54611	0	0	0	0	0	0	3.90395
35	AuClO2-2dm-3945	Au	10.1915	1	0	9.19154	Cl	7.29958	2	5.29958	0	O	6.25444	2	4.25444	0	2.84855
36	Al2Zn2S5-2dm-3288	Al	0.839284	0.839284	0	0	Zn	11.0525	2	0	9.05252	S	7.24327	2	5.24327	0	2.53995
37	Te3As2-2dm-5359	Te	6.12868	2	4.12868	0	As	4.80698	2	2.80697	0	0	0	0	0	0	2.17803
38	Al2Zn2S5-2dm-2999	Al	0.834669	0.834669	0	0	Zn	11.0545	2	0	9.05449	S	7.24433	2	5.24433	0	2.54002
39	As-2dm-3447	As	5	2	3	0	0	0	0	0	0	0	0	0	0	0	2.21078
40	AgI-2dm-4861	Ag	10.7504	1	0	9.75038	I	7.24962	2	5.24962	0	0	0	0	0	0	2.18501
41	Mg2Al2Se5-2dm-4027	Mg	6.38746	0.38746	0	0	Al	0.975185	0.975185	0	0	Se	7.45494	2	5.45494	0	2.26867
42	AgN3-2dm-3449	Ag	10.3503	1	0	9.35031	N	5.21656	2	3.21656	0	0	0	0	0	0	2.65024
43	Mg(AlS2)2-2dm-3543	Mg	6.36123	0.361228	0	0	Al	0.824867	0.824867	0	0	S	7.49726	2	5.49726	0	2.4228
44	Ag2SeO4-2dm-3267	Ag	10.4173	1	0	9.41726	Se	3.39479	2	1.3948	0	O	6.94267	2	4.94267	0	2.88061
45	Al2Zn2S5-2dm-3191	Al	0.837758	0.837758	0	0	Zn	11.0572	2	0	9.05717	S	7.24203	2	5.24203	0	2.5401
46	Al2ZnS4-2dm-3208	Al	0.836403	0.836403	0	0	Zn	11.0414	2	0	9.04135	S	7.32146	2	5.32146	0	2.50813
47	Mg(AlSe2)2-2dm-4113	Mg	6.39776	0.397762	0	0	Al	0.974985	0.974985	0	0	Se	7.41307	2	5.41307	0	2.27342
48	AgBrO4-2dm-4961	Ag	10.2522	1	0	9.25216	Br	4.58526	2	2.58526	0	O	6.79065	2	4.79065	0	3.09764
49	AgCl-2dm-5106	Ag	10.4659	1	0	9.46594	Cl	7.53406	2	5.53406	0	0	0	0	0	0	2.39167
50	WF5-2dm-4702	W	8.9061	2	0	0.906103	F	7.61878	2	5.61878	0	0	0	0	0	0	3.9195
51	Ag2SO4-2dm-4885	Ag	10.3974	1	0	9.39737	S	2.22214	2	0.222137	0	O	7.24578	2	5.24578	0	2.90947
52	Ge2Te5As2-2dm-3653	Ge	13.6086	2	1.60857	0	Te	6.22933	2	4.22933	0	As	4.8181	2	2.8181	0	2.00582
53	TiMn2O6-2dm-4397	Ti	7.84136	1	0	0.841357	Mn	11.2056	1	0	4.20563	O	6.9579	2	4.9579	0	3.08137
54	As-2dm-3312	As	5	2	3	0	0	0	0	0	0	0	0	0	0	0	2.21078
55	AsI3-2dm-5507	As	4.40573	2	2.40573	0	I	7.19809	2	5.19809	0	0	0	0	0	0	2.33819
56	AgNO3-2dm-4750	Ag	10.3156	1	0	9.31559	N	4.13727	2	2.13727	0	O	6.51572	2	4.51572	0	3.05736
57	Al2Te5-2dm-4985	Al	1.22373	1.22373	0	0	Te	6.71051	2	4.71051	0	0	0	0	0	0	2.0914
58	SnSe2-2dm-4715	Sn	12.7906	2	0.790553	0	Se	6.60472	2	4.60472	0	0	0	0	0	0	2.32214
59	Bi2Te2S-2dm-4461	Bi	4.13927	2	2.13927	0	Te	6.5024	2	4.5024	0	S	6.71666	2	4.71666	0	2.2228
60	AgClO4-2dm-3393	Ag	10.244	1	0	9.24396	Cl	4.08782	2	2.08782	0	O	6.91706	2	4.91706	0	3.1213
61	NiBr2-2dm-3741	Ni	15.2489	2	0	7.2489	Br	7.37554	2	5.37554	0	0	0	0	0	0	2.4084
62	Sr(SnAs)2-2dm-4761	Sr	8.68221	0.682206	0	0	Sn	13.4769	2	1.4769	0	As	6.182	2	4.182	0	1.98876
63	AuO2F-2dm-4797	Au	9.96467	1	0	8.96467	O	6.23555	2	4.23555	0	F	7.56423	2	5.56423	0	3.17491
64	BiIO-2dm-3710	Bi	3.42427	2	1.42427	0	I	7.47674	2	5.47674	0	O	7.09899	2	5.09899	0	2.77269
65	Ca3SiBr2-2dm-4523	Ca	8.6566	0.656601	0	0	Si	6.30012	2	4.30012	0	Br	7.86504	2	5.86504	0	2.24872
66	CuSe2Br-2dm-4942	Cu	16.5499	1	0	9.54985	Se	5.97822	2	3.97822	0	Br	7.49371	2	5.49371	0	2.40034
67	CuTe2Br-2dm-5156	Cu	16.6744	1	0	9.6744	Te	5.90202	2	3.90202	0	Br	7.52158	2	5.52158	0	2.29722
68	BiI3-2dm-3628	Bi	3.93594	2	1.93594	0	I	7.35469	2	5.35469	0	0	0	0	0	0	2.31302
69	Br-2dm-5522	Br	7	2	5	0	0	0	0	0	0	0	0	0	0	0	2.68517
70	CuBr-2dm-3405	Cu	16.5898	1	0	9.58978	Br	7.41024	2	5.41024	0	0	0	0	0	0	2.38456
71	SbBrO-2dm-4701	Sb	3.30268	2	1.30268	0	Br	7.53164	2	5.53164	0	O	7.16568	2	5.16568	0	2.90103
72	Bi2TeSe2-2dm-4503	Bi	4.11056	2	2.11056	0	Te	6.613	2	4.613	0	Se	6.58294	2	4.58294	0	2.24419
73	MnBr2-2dm-3606	Mn	11.7956	1	0	4.79563	Br	7.60218	2	5.60218	0	0	0	0	0	0	2.40436
74	Bi2Te2Se-2dm-4819	Bi	4.20272	2	2.20272	0	Te	6.39471	2	4.39471	0	Se	6.80514	2	4.80514	0	2.18313
75	Bi2Te3-2dm-4406	Bi	4.29988	2	2.29988	0	Te	6.46675	2	4.46675	0	0	0	0	0	0	2.11921
76	RhBr3-2dm-3618	Rh	14.4152	1	0	7.41519	Br	7.19494	2	5.19494	0	0	0	0	0	0	2.35665
77	HfBrN-2dm-4609	Hf	7.76307	1.76307	0	0	Br	7.59308	2	5.59308	0	N	6.64385	2	4.64385	0	2.57987
78	IrBr3-2dm-3663	Ir	8.46695	1	0	7.46695	Br	7.17768	2	5.17768	0	0	0	0	0	0	2.3969
79	InBr3-2dm-4040	In	11.6309	1.63095	0	0	Br	7.45635	2	5.45635	0	0	0	0	0	0	2.60655
80	Bi2Se3-2dm-4453	Bi	4.00942	2	2.00942	0	Se	6.66039	2	4.66039	0	0	0	0	0	0	2.30825
81	B2S3-2dm-3796	B	1.47272	1.47272	0	0	S	7.01819	2	5.01819	0	0	0	0	0	0	2.4834
82	Bi2Te2S-2dm-3473	Bi	4.1368	2	2.1368	0	Te	6.39727	2	4.39727	0	S	6.93185	2	4.93185	0	2.22522
83	BiBrO-2dm-3406	Bi	3.33731	2	1.33731	0	Br	7.57	2	5.57	0	O	7.09269	2	5.09269	0	2.90878
84	CrCl3-2dm-3836	Cr	10.5258	1	0	3.52576	Cl	7.49141	2	5.49141	0	0	0	0	0	0	2.64177
85	InClO-2dm-3585	In	11.2575	1.25754	0	0	Cl	7.53495	2	5.53495	0	O	7.20751	2	5.20751	0	3.04677
86	SnClF-2dm-5132	Sn	12.545	0.682206	1.86275	0	CL	7.67056	2	5.67056	0	F	7.78448	2	5.78448	0	2.94942
87	CrBr3-2dm-3768	Cr	10.7073	1	0	3.70726	Br	7.43092	2	5.43092	0	0	0	0	0	0	2.48578
88	Ba(BSe3)2-2dm-4261	Ba	8.4981	0.498101	0	0	B	2.26207	2	0.262072	0	Se	6.49629	2	4.49629	0	2.34929
89	PdCl2-2dm-3243	Pd	9.38949	0	0	9.38949	Cl	7.30525	2	5.30525	0	0	0	0	0	0	2.36605
90	CuI-2dm-4972	Cu	16.7179	1	0	9.71791	I	7.2821	2	5.2821	0	0	0	0	0	0	2.25539
91	InBrO-2dm-3667	In	11.3303	1.3303	0	0	Br	7.46641	2	5.46641	0	O	7.20329	2	5.20329	0	2.95898
92	CuSe2Cl-2dm-4225	Cu	16.472	1	0	9.47195	Se	5.97172	2	3.97172	0	Cl	7.58463	2	5.58463	0	2.44686
93	CrO2-2dm-5091	Cr	10.1357	1	0	3.13569	O	6.93216	2	4.93216	0	0	0	0	0	0	3.07135
94	IrCl3-2dm-3776	Ir	8.11363	1	0	7.11363	Cl	7.29546	2	5.29546	0	0	0	0	0	0	2.53612
95	BiBr3-2dm-3868	Bi	3.64132	2	1.64132	0	Br	7.45289	2	5.45289	0	0	0	0	0	0	2.59392
96	AuI-2dm-3495	Au	10.9831	1	0	9.98313	I	7.01687	2	5.01687	0	0	0	0	0	0	2.11766
97	CuBr-2dm-3517	Cu	16.5865	1	0	9.58648	Br	7.41351	2	5.41351	0	0	0	0	0	0	2.38453
98	Sr2CoO3-2dm-4427	Sr	8.51948	0.519478	0	0	Co	7.94871	1	0	6.94871	O	7.33745	2	5.33745	0	2.97911
99	NiCl2-2dm-3432	Ni	15.0594	2	0	7.0594	Cl	7.4703	2	5.4703	0	0	0	0	0	0	2.52298
100	CuTe2I-2dm-5239	Cu	16.7618	1	0	9.76181	Te	5.92021	2	3.92021	0	I	7.39775	2	5.39775	0	2.21808
101	LiCuO2-2dm-4683	Li	2.10612	0.106119	0	0	Cu	15.8208	1	0	4.82084	O	7.03653	2	5.03653	0	3.06908
102	Ba2TiO4-2dm-3897	Ba	8.47631	0.476312	0	0	Ti	7.93493	1	0	0.934928	O	7.27811	2	5.27811	0	3.24555
103	AuBr-2dm-4576	Au	10.8259	1	0	9.82594	Br	7.17406	2	5.17406	0	0	0	0	0	0	2.24567
104	VCl2-2dm-3622	V	9.69187	1	0	2.69187	Cl	7.65406	2	5.65406	0	0	0	0	0	0	2.5805
105	CuTe2Cl-2dm-4859	Cu	16.608	1	0	9.60797	Te	5.89222	2	3.89222	0	Cl	7.60759	2	5.60759	0	2.34413
106	Ge(BiTe2)2-2dm-3740	Ge	13.5478	2	1.54777	0	Bi	4.31839	2	2.31839	0	Te	6.45386	2	4.45386	0	2.02629
107	RhCl3-2dm-3458	Rh	14.109	1	0	7.10902	Cl	7.29699	2	5.29699	0	0	0	0	0	0	2.49663
108	HfS2-2dm-3834	Hf	7.92795	1.92795	0	0	S	7.03603	2	5.03603	0	0	0	0	0	0	2.34947
109	HfSe2-2dm-4424	Hf	8.1127	2	0	0.112696	Se	6.94365	2	4.94365	0	0	0	0	0	0	2.19963
110	HfTeSe4-2dm-4723	Hf	8.09727	2	0	0.097265	Te	5.13077	2	3.13077	0	Se	6.69299	2	4.69299	0	2.27605
111	GeI2-2dm-3455	Ge	13.2843	2	1.28427	0	I	7.35786	2	5.35786	0	0	0	0	0	0	2.11218
112	ZnI2-2dm-4716	Zn	11.2331	2	0	9.23313	I	7.38344	2	5.38344	0	0	0	0	0	0	2.48657
113	MnI2-2dm-3728	Mn	11.9595	1	0	4.95951	I	7.52025	2	5.52025	0	0	0	0	0	0	2.1741
114	InSe-2dm-3459	In	12.3131	2	0.313132	0	Se	6.68687	2	4.68687	0	0	0	0	0	0	2.23488
115	GaSe-2dm-3530	Ga	12.338	2	0.338043	0	Se	6.66196	2	4.66196	0	0	0	0	0	0	2.32584
116	CdI2-2dm-4402	Cd	11.2205	2	0	9.22055	I	7.38972	2	5.38972	0	0	0	0	0	0	2.51444
117	InSe-2dm-3756	In	12.2775	2	0.277521	0	Se	6.72248	2	4.72248	0	0	0	0	0	0	2.23838
118	HfS3-2dm-3809	Hf	8.02733	2	0	0.027326	S	6.65756	2	4.65756	0	0	0	0	0	0	2.41144
119	GaTe-2dm-3099	Ga	12.5539	2	0.553883	0	Te	6.44611	2	4.44611	0	0	0	0	0	0	2.1611
120	GeClF-2dm-4252	Ge	12.6686	2	0.668649	0	Cl	7.60049	2	5.60049	0	F	7.73086	2	5.73086	0	3.10988
121	SnBrF-2dm-3978	Sn	12.6174	2	0.617357	0	Br	7.59449	2	5.59449	0	F	7.78815	2	5.78815	0	3.19639
122	Cu2WS4-2dm-4517	Cu	16.5356	1	0	9.53559	W	10.4275	2	0	2.42745	S	6.62536	2	4.62536	0	2.30389
123	GaSe-2dm-3781	Ga	12.4616	2	0.461567	0	Se	6.53843	2	4.53843	0	0	0	0	0	0	2.33798
124	CuBiO2-2dm-4048	Cu	16.4579	1	0	9.45785	Bi	3.34442	2	1.34442	0	O	7.09886	2	5.09886	0	2.85547
125	AuBrO2-2dm-4476	Au	10.3118	1	0	9.31183	Br	7.17457	2	5.17457	0	O	6.2568	2	4.2568	0	2.80328
126	KH2N-2dm-3412	K	8.18973	0.189731	0	0	H	0.716572	0.716572	0	0	N	6.37713	2	4.37713	0	2.7288
127	MnCl2-2dm-3745	Mn	11.6676	1	0	4.66758	Cl	7.66621	2	5.66621	0	0	0	0	0	0	2.54108
128	GaS-2dm-3608	Ga	12.1923	2	0.19225	0	S	6.80775	2	4.80775	0	0	0	0	0	0	2.4341
129	CuI-2dm-3638	Cu	16.6972	1	0	9.69715	I	7.30285	2	5.30285	0	0	0	0	0	0	2.25494
130	SbClO-2dm-4179	Sb	3.21895	2	1.21895	0	Cl	7.61826	2	5.61826	0	O	7.16279	2	5.16279	0	2.98256
131	SnO-2dm-3088	Sn	12.7406	2	0.740638	0	O	7.25936	2	5.25936	0	0	0	0	0	0	3.08394
132	P-2dm-3043	P	5	2	3	0	0	0	0	0	0	0	0	0	0	0	2.2527
133	Cu2WSe4-2dm-3107	Cu	16.6753	1	0	9.6753	W	10.7632	2	0	2.76324	Se	6.47154	2	4.47154	0	2.22109
134	Mn2CrO6-2dm-4419	Mn	11.2062	1	0	4.20616	Cr	10.1356	1	0	3.13562	O	6.90868	2	4.90868	0	3.03659
135	BiClO-2dm-3678	Bi	3.26937	2	1.26937	0	Cl	7.64477	2	5.64477	0	O	7.08585	2	5.08585	0	2.99004
136	Sn(BiTe2)2-2dm-5176	Sn	13.3538	2	1.35379	0	Bi	4.31945	2	2.31945	0	Te	6.50183	2	4.50183	0	2.10181
137	TeRhCl-2dm-3467	Te	5.64026	2	3.64026	0	Rh	14.8909	1	0	7.89091	Cl	7.46883	2	5.46883	0	2.15246
138	VI2-2dm-3251	V	9.94303	1	0	2.94303	I	7.52848	2	5.52848	0	0	0	0	0	0	2.17313
139	Ge(Te2As)2-2dm-3605	Ge	13.6113	2	1.61131	0	Te	6.19497	2	4.19497	0	As	4.80441	2	2.80441	0	2.06928
140	GaS-2dm-4063	Ga	12.1885	2	0.188453	0	S	6.81155	2	4.81155	0	0	0	0	0	0	2.43378
141	Mn(BiTe2)2-2dm-3199	Mn	12.1518	1	0	5.15181	Bi	4.30368	2	2.30368	0	Te	6.56021	2	4.56021	0	2.06614
142	GeS2-2dm-3352	Ge	12.736	2	0.736011	0	S	6.632	2	4.632	0	0	0	0	0	0	2.28103
143	CaO2-2dm-4188	Ca	8.46981	0.469808	0	0	O	6.7651	2	4.7651	0	0	0	0	0	0	3.4225
144	TiBrN-2dm-3460	Ti	8.11427	1	0	1.11427	Br	7.48925	2	5.48925	0	N	6.39648	2	4.39648	0	2.57541
145	GaGeTe-2dm-4155	Ga	12.5489	2	0.548897	0	Ge	14.0073	2	2.0073	0	Te	6.4438	2	4.4438	0	1.84584
146	CaO-2dm-3363	Ca	8.53986	0.539861	0	0	O	7.46014	2	5.46014	0	0	0	0	0	0	3.26684
147	GaN-2dm-2992	Ga	11.5362	1.53615	0	0	N	6.46385	2	4.46385	0	0	0	0	0	0	2.73271
148	TiNCl-2dm-3655	Ti	8.07542	1	0	1.07542	N	6.3665	2	4.3665	0	Cl	7.55807	2	5.55807	0	2.664
149	TaI2O-2dm-3609	Ta	9.12621	2	0	1.12621	I	7.36522	2	5.36522	0	O	7.14334	2	5.14334	0	2.53734
150	LiCuO-2dm-4132	Li	2.10928	0.109275	0	0	Cu	16.5883	1	0	5.5883	O	7.30245	2	5.30245	0	2.81445
151	Ca2CoO3-2dm-3010	Ca	8.52091	0.520914	0	0	Co	8.19342	1	0	7.19342	O	7.25492	2	5.25492	0	2.9763
152	CuClO2-2dm-5076	Cu	16.0135	1	0	9.0135	Cl	7.45853	2	5.45853	0	O	6.264	2	4.264	0	2.92786
153	Cu2SO4-2dm-3586	Cu	16.3534	1	0	9.35338	S	2.21961	2	0.219611	0	O	7.2684	2	5.2684	0	2.95781
154	V2CoO6-2dm-3124	V	8.89741	1	0	1.89741	Co	7.97559	1	0	6.97559	O	6.8716	2	4.8716	0	3.06587
