# Supplementary material for: High-throughput computation and machine learning screening of van der Waals heterostructures for Z-scheme photocatalysis
Source: Royal Society of Chemistry journal article supplement (doi:10.1039/d4ta07683d), 2025-01-01
Supplement: d4ta07683d3.xlsx [file d4ta07683d3.xlsx]

## Sheet: Sheet1
element	s orbitals	p orbitals	d orbitals
H	13.61
He	24.59
Li	5.39
Be	9.32
B	14.05	8.3
C	19.43	10.66
N	25.56	13.18
O	32.38	15.85
F	40.17	18.65
Ne	48.47	21.59
Na	5.14
Mg	7.65
Al	11.32	5.98
Si	14.89	7.78
P	18.84	9.65
S	22.71	11.62
Cl	25.23	13.67
Ar	29.24	15.82
K	4.34
Ca	6.11
Sc	6.6		7.92
Ti	7.12		9.22
V	7.32		10.11
Cr	7.46		10.75
Mn	7.84		11.14
Fe	7.91		11.66
Co	8.1		12.12
Ni	8.22		12.93
Cu	8.42		13.47
Zn	9.39		17.3
Ga	12.61	16.05
Ge	5.93	7.54
As	18.94	9.17
Se	21.37	10.82
Br	24.37	12.49
Kr	27.51	14.22
Rb	4.18
Sr	5.7
Y	6.7		6.49
Zr	7.31		8.31
Nb	7.22		8.86
Mo	7.24		9.14
Tc	7.21		9.25
Ru	7.13		9.31
Rh	7.28		9.45
Pd	7.44		9.58
Ag	7.58		12.78
Cd	8.99		17.86
In	11.89	5.6
Sn	14.56	7.01
Sb	16.74	8.41
Te	18.71	9.79
I	20.89	11.18
Xe	23.4	12.56
Cs	3.9
Ba	5.21
La	7.04		5.28
Hf	7.52		6.14
Ta	8.45		7.58
W	8.52		8.76
Re	8.76		9.7
Os	8.82		10
Ir	8.83		10.22
Pt	8.75		10.37
Au	9.22		11.86
Hg	10.44		15.59
Tl	13.14	5.47
Pb	15.12	6.81
Bi	17.52	8.15
Po	20.05	9.42
At	22.69	10.71
Rn	25.47	12.03

## Sheet: Sheet2
Orbital Energies
key: units:	s orbitals p orbitals d orbitals eV
H																	He
-13.61																	-24.59
Li	Be											B	c	N	0	F	Ne
-5.39	-9.32											-14.05	-19.43	-25.56	-32.38	-40.17	-48.47
												-8.3	-10.66	-13.18	-15.85	-18.65	-21.59
Na	Mg											Al	Si	p	s	Cl	Ar
-5.14	-7.65											-11.32	-14.89	-18.84	-22.71	-25.23	-29.24
												-5.98	-7.78	-9.65	-11.62	-13.67	-15.82
K	Ca	sc	Ti	V	Cr	Mn	Fe	co	Ni	cu	Zn	Ga	Ge	As	Se	Br	Kr
-4.34	-6.11	-6.6	-7.12	-7.32	-7.46	-7.84	-7.91	-8.1	-8.22	-8.42	-9.39	-12.61	-16.05	-18.94	-21.37	-24.37	-27.51
		-7.92	-9.22	-10.11	-10.75	-11.14	-11.66	-12.12	-12.93	-13.47	-17.3	-5.93	-7.54	-9.17	-10.82	-12.49	-14.22
Rb	Sr	Y	Zr	Nb	Mo	Tc	Ru	Rh	Pd	Ag	Cd	In	Sn	Sb	Te		Xe
4.18	-5.7	-6.7	-7.31	-7.22	-7.24	-7.21	-7.13	-7.28	-7.44	-7.58	-8.99	-11.89	-14.56	-16.74	-18.71	-20.89	-23.4
		-6.49	-8.31	-8.86	-9.14	-9.25	-9.31	-9.45	-9.58	-12.78	-17.86	-5.6	-7.01	-8.41	-9.79	-11.18	-12.56
Cs	Ba	La	Hf	Ta	w	Re	Os	1 r	pt	Au	Hg	Tl	p b	Bi	po	At	Rn
-3.9	-5.21	-7.04	-7.52	-8.45	-8.52	-8.76	-8.82	-8.83	-8.75	-9.22	-10.44	-13.14	-15.12	-17.52	-20.05	-22.69	-25.47
		-5.28	-6.14	-7.58	-8.76	-9.7	-10	-10.22	-10.37	-11.86	-15.59	-5.47	-6.81	-8.15	-9.42	-10.71	-12.03
Fr	Ra	Ac
2	2	2
